# Supplementary material for: Fungal Endophytes: Discovering What Lies within Some of Canada’s Oldest and Most Resilient Grapevines
Source: MDPI journal article supplement (doi:10.3390/jof10020105), 2024-01-26
Supplement: s1 [file s1]

| Compound               | Formula                                                       | <i>D. eres</i><br>(# of strains) | <i>D. sp. -</i><br>En01.1 | <i>D. aff. gulyae</i><br>En20.4 | <i>C. fioriniae</i><br>En25.3 | <i>G. paraclavulata</i><br>En61.1 | <i>N. niveniae</i><br>En61.2 |
|------------------------|---------------------------------------------------------------|----------------------------------|---------------------------|---------------------------------|-------------------------------|-----------------------------------|------------------------------|
| proline betaine        | C <sub>7</sub> H <sub>13</sub> NO <sub>2</sub>                | + (4)                            | +                         | -                               | -                             | -                                 | -                            |
| tryptamine             | C <sub>10</sub> H <sub>12</sub> N <sub>2</sub>                | + (3)                            | -                         | -                               | -                             | -                                 | -                            |
| hypoxanthine           | C <sub>5</sub> H <sub>4</sub> N <sub>4</sub> O                | + (4)                            | +                         | -                               | -                             | -                                 | -                            |
| phenylethylamine       | C <sub>8</sub> H <sub>11</sub> N                              | + (2)                            | -                         | -                               | -                             | -                                 | -                            |
| choline sulfate        | C <sub>5</sub> H <sub>13</sub> NO <sub>4</sub> S              | + (2)                            | -                         | -                               | +                             | +                                 | +                            |
| phosphocholine         | C <sub>31</sub> H <sub>54</sub> NO <sub>6</sub> P             | + (1)                            | -                         | -                               | -                             | -                                 | -                            |
| -                      | C <sub>18</sub> H <sub>33</sub> NO <sub>2</sub>               | + (4)                            | -                         | -                               | -                             | -                                 | -                            |
| -                      | C <sub>18</sub> H <sub>35</sub> NO <sub>2</sub>               | + (4)                            | -                         | -                               | -                             | -                                 | -                            |
| -                      | C <sub>18</sub> H <sub>33</sub> NO                            | + (3)                            | -                         | -                               | -                             | -                                 | -                            |
| -                      | C <sub>18</sub> H <sub>35</sub> NO                            | + (3)                            | -                         | -                               | -                             | -                                 | -                            |
| -                      | C <sub>12</sub> H <sub>17</sub> NO                            | + (3)                            | -                         | -                               | -                             | -                                 | -                            |
| -                      | C <sub>12</sub> H <sub>14</sub> N <sub>2</sub> O              | + (3)                            | -                         | -                               | -                             | -                                 | -                            |
| Nectriapyrone          | C <sub>11</sub> H <sub>14</sub> O <sub>3</sub>                | + (4)                            | -                         | +                               | -                             | -                                 | -                            |
| -                      | C <sub>10</sub> H <sub>13</sub> NO                            | + (3)                            | -                         | -                               | -                             | -                                 | -                            |
| -                      | C <sub>18</sub> H <sub>28</sub> O <sub>3</sub>                | + (2)                            | +                         | -                               | +                             | -                                 | -                            |
| -                      | C <sub>9</sub> H <sub>12</sub> O <sub>4</sub>                 | + (2)                            | +                         | -                               | -                             | -                                 | -                            |
| -                      | C <sub>13</sub> H <sub>27</sub> N <sub>3</sub> O <sub>3</sub> | + (2)                            | -                         | -                               | -                             | +                                 | -                            |
| -                      | C <sub>6</sub> H <sub>15</sub> NO <sub>2</sub>                | + (1)                            | -                         | -                               | +                             | -                                 | -                            |
| -                      | C <sub>5</sub> H <sub>13</sub> NO                             | + (1)                            | -                         | -                               | -                             | -                                 | +                            |
| -                      | C <sub>31</sub> H <sub>56</sub> NO <sub>6</sub> P             | + (1)                            | -                         | -                               | -                             | -                                 | -                            |
| -                      | C <sub>10</sub> H <sub>10</sub> O <sub>3</sub>                | + (1)                            | -                         | -                               | -                             | -                                 | -                            |
| -                      | C <sub>12</sub> H <sub>14</sub> O <sub>3</sub>                | + (1)                            | -                         | -                               | -                             | -                                 | -                            |
| Desmethylnectriapyrone | C <sub>10</sub> H <sub>12</sub> O <sub>3</sub>                | + (1)                            | -                         | -                               | -                             | -                                 | -                            |
| -                      | C <sub>15</sub> H <sub>20</sub> O <sub>5</sub>                | + (1)                            | -                         | -                               | -                             | -                                 | -                            |
| -                      | C <sub>15</sub> H <sub>20</sub> O <sub>6</sub>                | + (1)                            | -                         | -                               | -                             | -                                 | -                            |
| -                      | C <sub>20</sub> H <sub>43</sub> NO <sub>2</sub>               | + (1)                            | -                         | -                               | -                             | +                                 | +                            |
| -                      | C <sub>30</sub> H <sub>52</sub> N <sub>6</sub> O <sub>8</sub> | -                                | +                         | +                               | -                             | -                                 | -                            |
| -                      | C <sub>13</sub> H <sub>19</sub> NO <sub>3</sub>               | -                                | +                         | +                               | -                             | -                                 | -                            |
| -                      | C <sub>27</sub> H <sub>40</sub> O                             | -                                | -                         | +                               | -                             | -                                 | +                            |
| -                      | C <sub>6</sub> H <sub>14</sub> O <sub>3</sub>                 | -                                | -                         | +                               | -                             | -                                 | -                            |
| -                      | C <sub>21</sub> H <sub>29</sub> N <sub>5</sub> O <sub>4</sub> | -                                | -                         | +                               | -                             | -                                 | -                            |
| -                      | C <sub>22</sub> H <sub>47</sub> NO <sub>3</sub>               | -                                | -                         | +                               | -                             | -                                 | -                            |
| -                      | C <sub>9</sub> H <sub>10</sub> O <sub>4</sub>                 | -                                | -                         | +                               | -                             | -                                 | -                            |
| -                      | C <sub>38</sub> H <sub>38</sub> O <sub>16</sub>               | -                                | +                         | -                               | -                             | -                                 | -                            |
| -                      | C <sub>11</sub> H <sub>10</sub> O <sub>4</sub>                | -                                | +                         | -                               | -                             | -                                 | -                            |
| -                      | C <sub>39</sub> H <sub>54</sub> N <sub>6</sub> O <sub>9</sub> | -                                | +                         | -                               | -                             | -                                 | -                            |
| carnitine              | C <sub>7</sub> H <sub>15</sub> NO <sub>3</sub>                | -                                | -                         | -                               | +                             | -                                 | +                            |
| -                      | C <sub>21</sub> H <sub>34</sub> O <sub>4</sub>                | -                                | -                         | -                               | +                             | -                                 | -                            |
| -                      | C <sub>11</sub> H <sub>20</sub> O <sub>6</sub>                | -                                | -                         | -                               | +                             | -                                 | -                            |
| -                      | C <sub>11</sub> H <sub>18</sub> O <sub>5</sub>                | -                                | -                         | -                               | +                             | -                                 | -                            |
| -                      | C <sub>18</sub> H <sub>34</sub> O <sub>5</sub>                | -                                | -                         | -                               | +                             | -                                 | -                            |
| -                      | C <sub>25</sub> H <sub>29</sub> NO <sub>8</sub>               | -                                | -                         | -                               | -                             | +                                 | +                            |
| -                      | C <sub>20</sub> H <sub>21</sub> NO <sub>6</sub>               | -                                | -                         | -                               | -                             | +                                 | +                            |
| -                      | C <sub>9</sub> H <sub>17</sub> NO <sub>3</sub>                | -                                | -                         | -                               | -                             | +                                 | +                            |
| -                      | C <sub>19</sub> H <sub>30</sub> O <sub>3</sub>                | -                                | -                         | -                               | -                             | +                                 | -                            |
| Ile/Phe                | C <sub>15</sub> H <sub>22</sub> N <sub>2</sub> O <sub>3</sub> | -                                | -                         | -                               | -                             | +                                 | +                            |

|         |                      |   |   |   |   |   |   |
|---------|----------------------|---|---|---|---|---|---|
| Ile/Ile | $C_{12}H_{24}N_2O_3$ | - | - | - | - | - | + |
| Ser/Val | $C_8H_{16}N_2O_4$    | - | - | - | - | - | + |
| Ile/Pro | $C_{11}H_{20}N_2O_3$ | - | - | - | - | - | + |
| Leu/Val | $C_{11}H_{22}N_2O_3$ | - | - | - | - | - | + |
| Leu/Thr | $C_{10}H_{20}N_2O_4$ | - | - | - | - | - | + |
| -       | $C_{18}H_{39}NO_3$   | - | - | - | - | - | + |

TABLE S2: Extrolite screening of bioactive compounds produced fungal endophytes strains
