# Supplementary material for: Fungal Endophytes: Discovering What Lies within Some of Canada’s Oldest and Most Resilient Grapevines
Source: MDPI journal article supplement (doi:10.3390/jof10020105), 2024-01-26
Supplement: s1 [file s1]

TABLE S1. Sequences of forward and reverse primers of seven loci used in PCR amplification and sequencing for identification of fungal endophytes isolated from grapevine.

| Locus              | Primer                 | Sequence (5' to 3')                                  | Reference                                                  |
|--------------------|------------------------|------------------------------------------------------|------------------------------------------------------------|
| TUB2 <sup>a</sup>  | T1<br>β-Sandy-R        | AACATGCGTGAGATTGTAAGT<br>GCRCGNGGVACRTACTTGTT        | O'Donnell and Cigelnik (1997)<br>Stukenbrock et al. (2012) |
| ITS <sup>b</sup>   | ITS1<br>ITS4           | TCCGTAGGTGAACCTGCGG<br>TCCTCCGCTTATTGATATGC          | White et al. (1990)<br>White et al. (1990)                 |
| TEF-1 <sup>c</sup> | EF1-low<br>EF1-low     | GARGTACCAGTSATCATGTTCTT<br>GARGTACCAGTSATCATGTTCTT   | O'Donnell et al. 1998<br>O'Donnell et al. 1998             |
| RPB2 <sup>d</sup>  | fRPB2-5F<br>fRPB2-414R | GAYGAYMGWGATCAYTTYGG<br>ACMANNNCCCCARTGNGWRTTRTG     | Liu et al. (1999)<br>Quaedvlieg et al. (2011)              |
| ACT <sup>e</sup>   | ACT-512F<br>ACT2Rd     | ATGTGCAAGGCCGGTTTCGC<br>ARRTCRCGDCCRGCCATGTC         | Carbone & Kohn (1999)<br>Groenewald et al. (2012)          |
| CHS-1 <sup>f</sup> | CHS-79F<br>CHS-79R     | TGGGGCAAGGATGCTTGGAAGAAG<br>TGGAAGAACCATCTGTGAGAGTTG | Carbone and Kohn (1999)<br>Carbone and Kohn (1999)         |
| LSU <sup>g</sup>   | LSU1Fd<br>LR5          | GRATCAGGTAGGRATACCCG<br>TCCTGAGGGAAACTTCG            | Crous et al. (2009a)<br>Vilgalys & Hester (1990)           |

<sup>a</sup>β-tubulin, <sup>b</sup>Internal transcribed spacer (ITS) region of 5.8 S ribosomal DNA, <sup>c</sup>Part of the translation elongation factor 1 alpha, <sup>d</sup>RNA polymerase second largest subunit, <sup>e</sup>Partial actin, <sup>f</sup>Chitin synthase I and <sup>g</sup>28S nuclear ribosomal DNA gene.
